# Supplementary figures and images for: Heterogeneous photocatalytic water reduction using a QD-cluster pentacobalt polyoxotungstate complex
Source: Royal Society of Chemistry journal article supplement (doi:10.1039/c9nj00327d), 2019-01-01

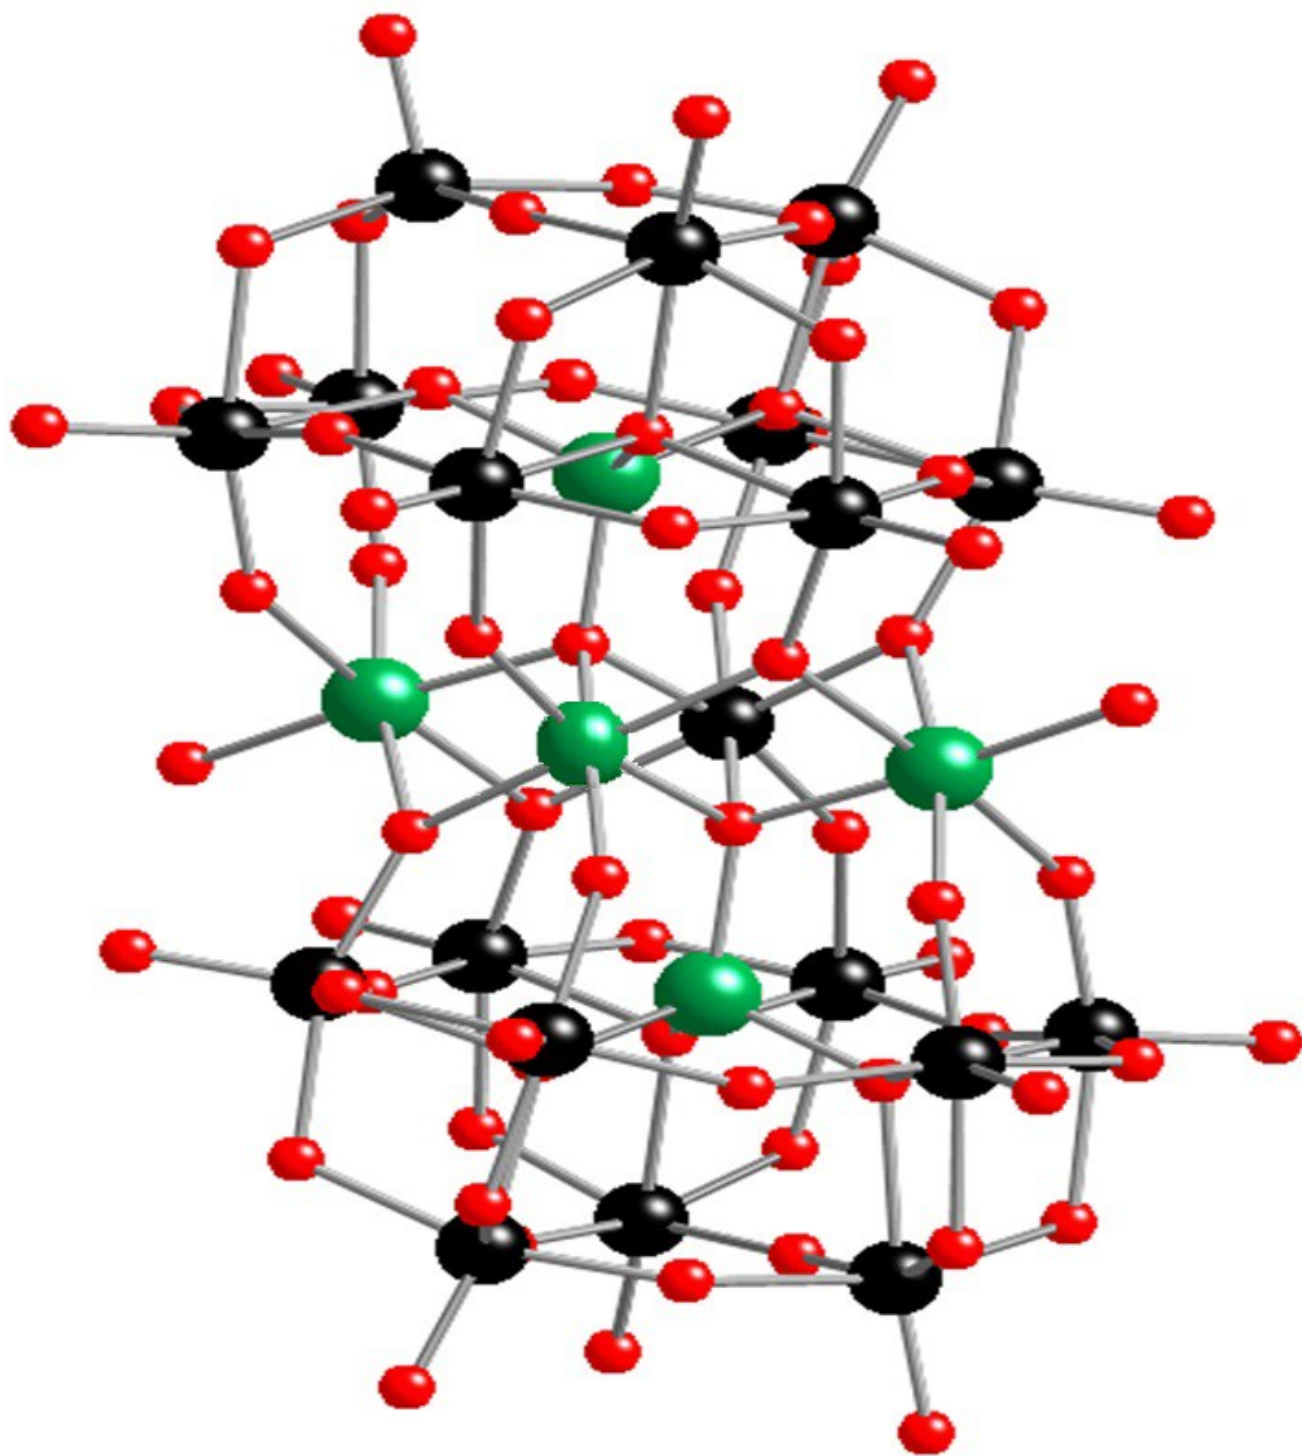

Supplement: c9nj00327d2.pdf [file c9nj00327d2.pdf]

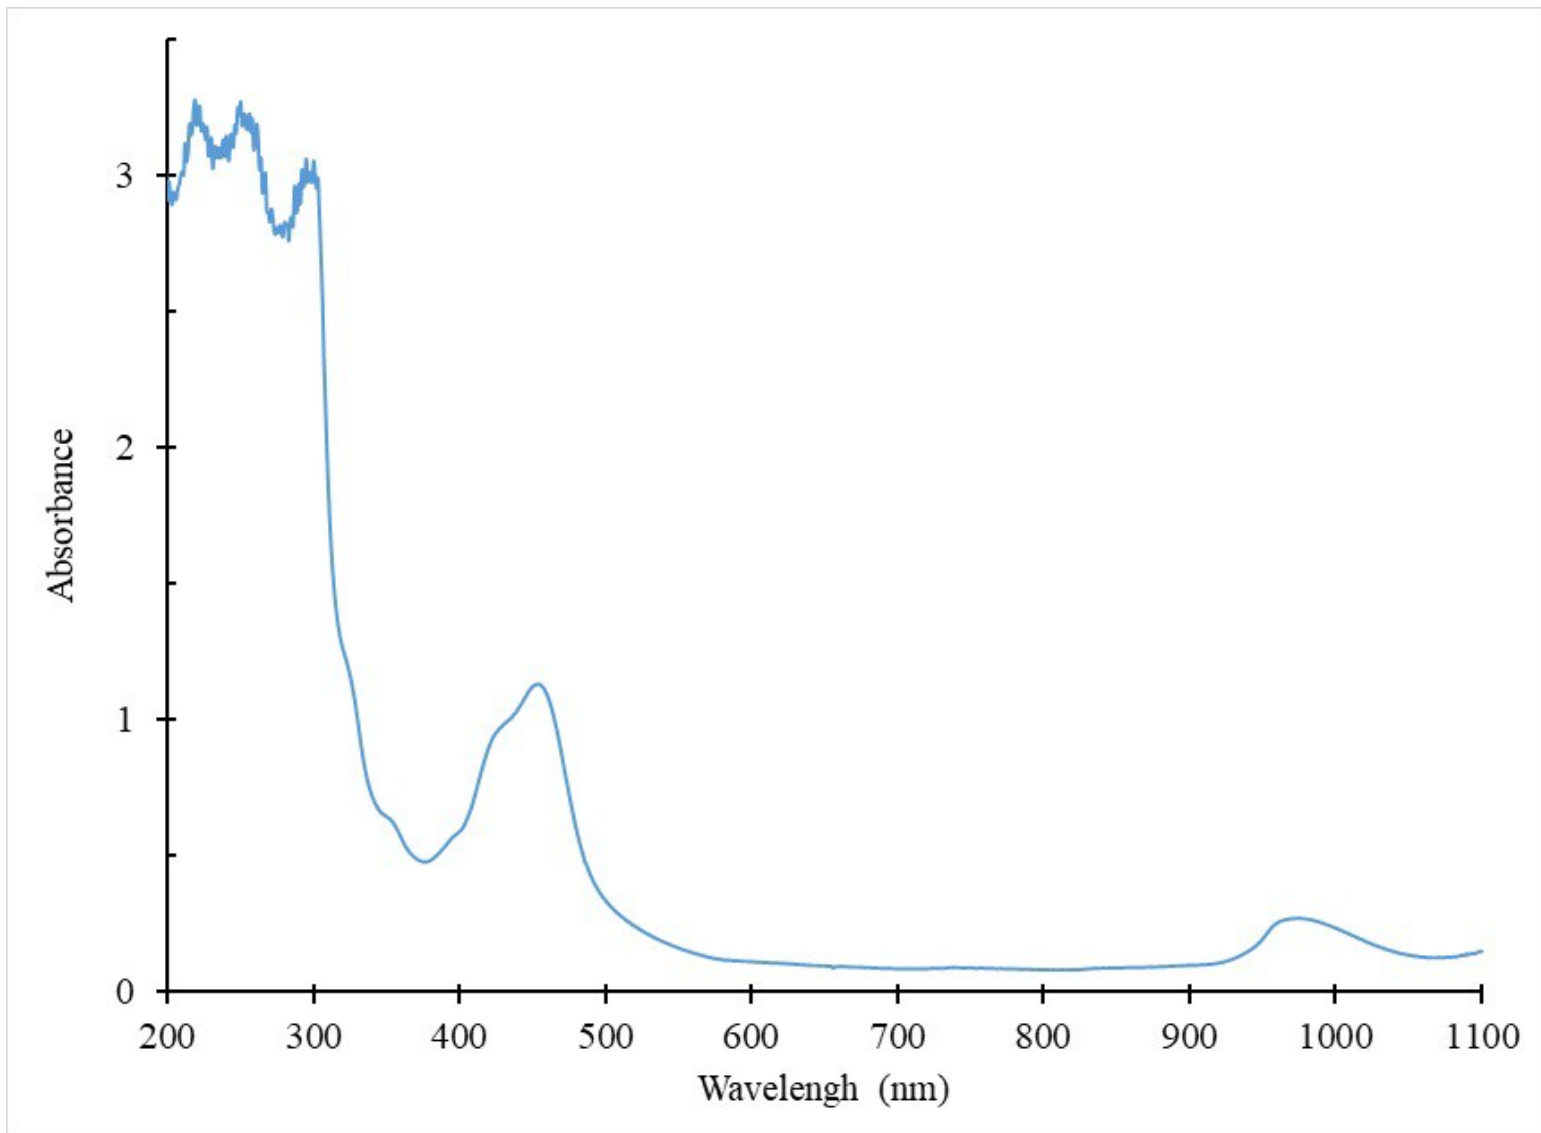

Supplement: c9nj00327d3.pdf [file c9nj00327d3.pdf]

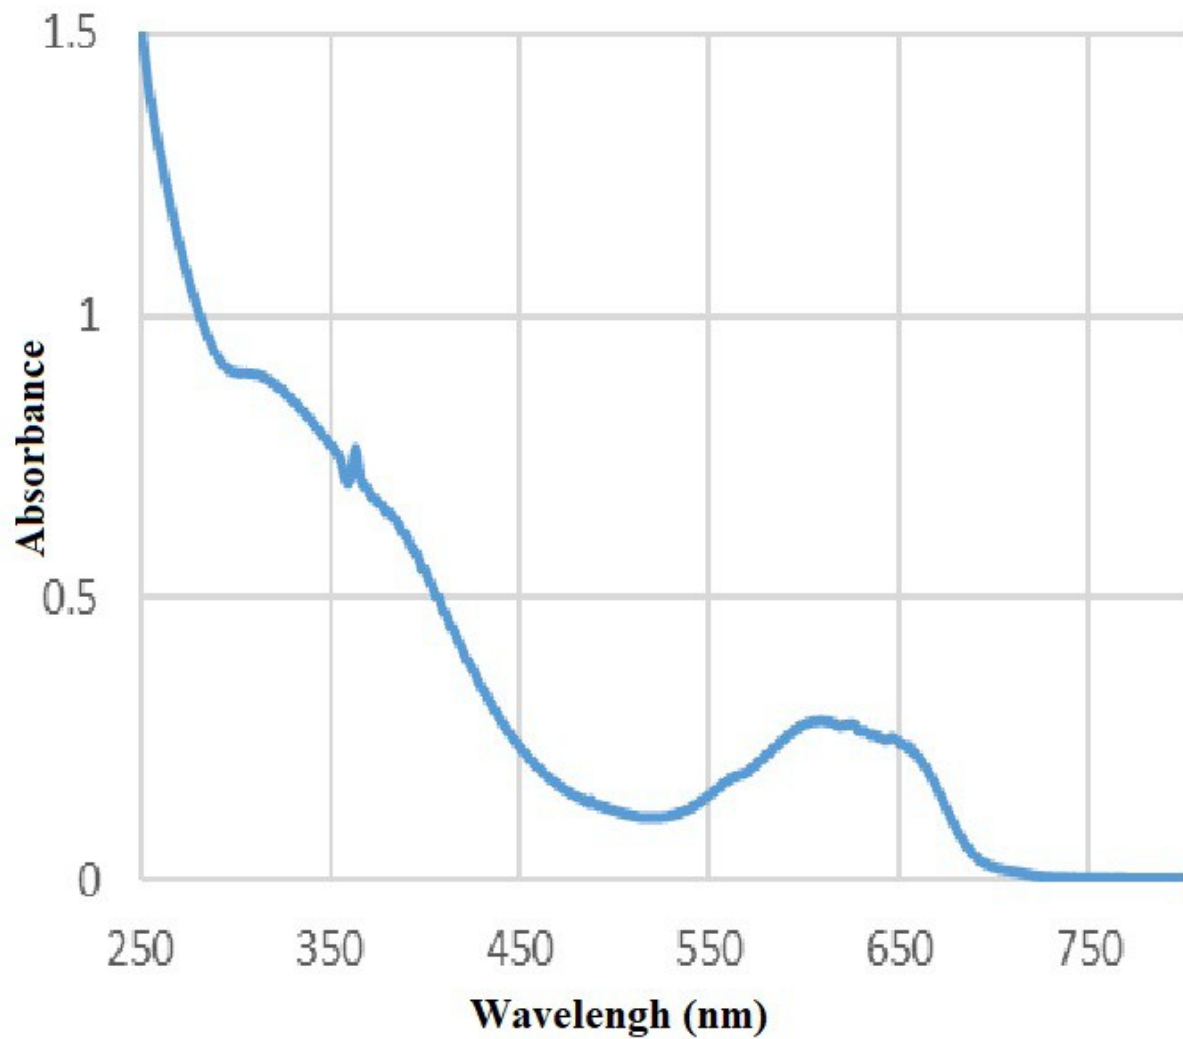

Supplement: c9nj00327d4.pdf [file c9nj00327d4.pdf]

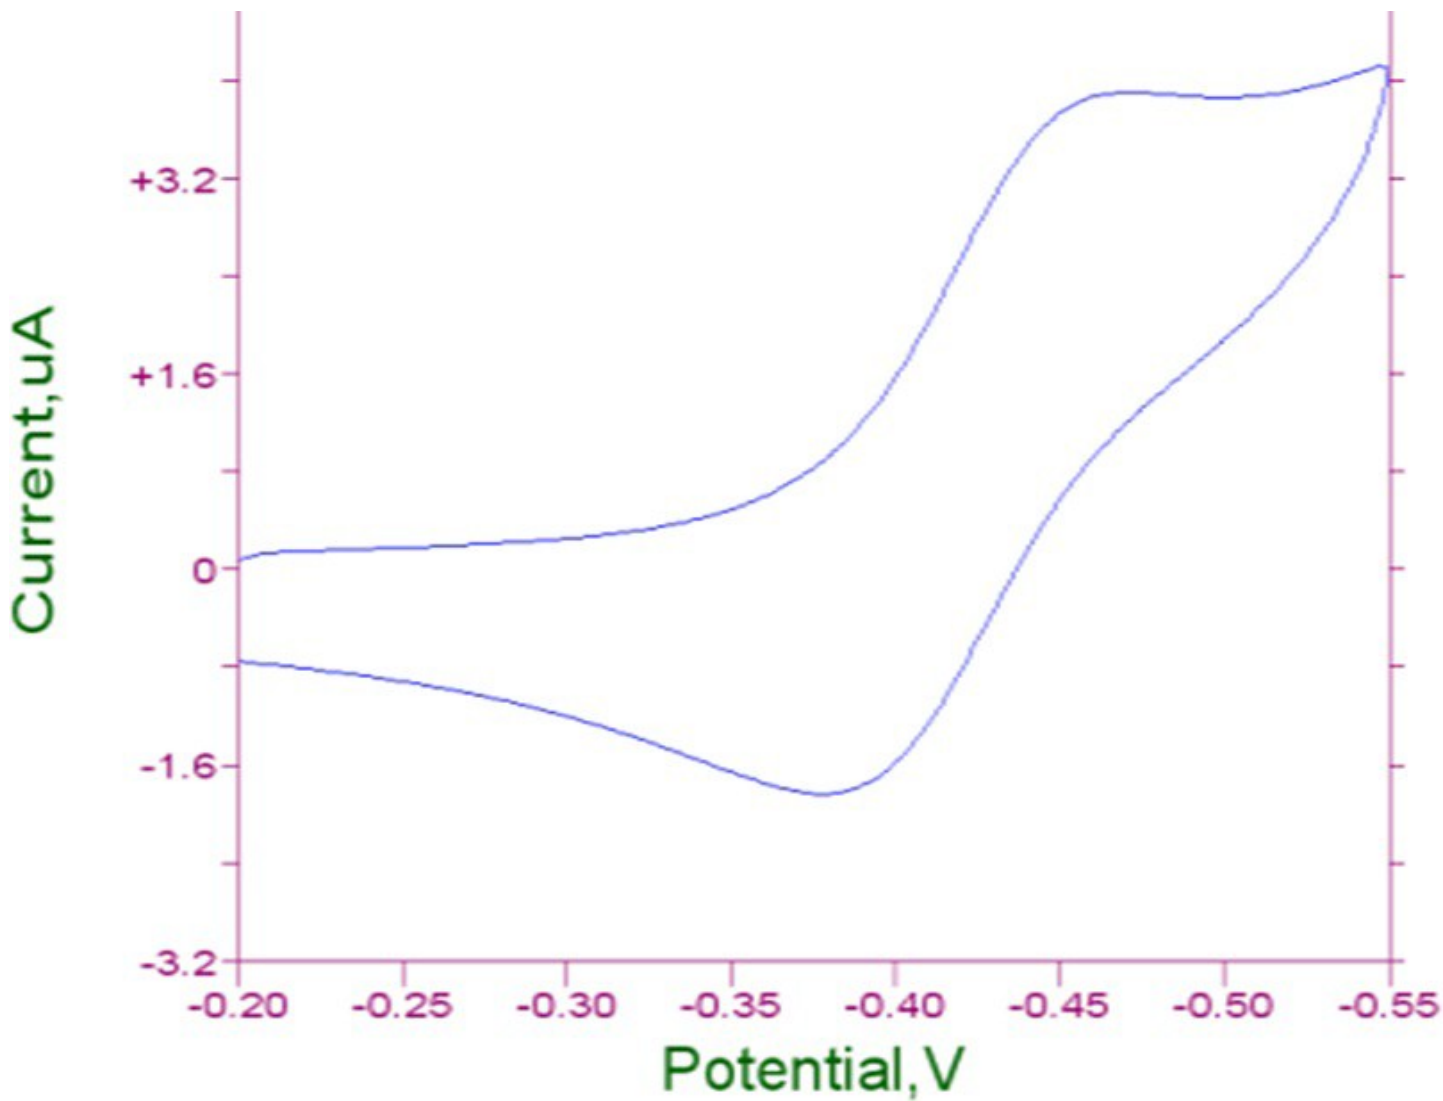

Supplement: c9nj00327d5.pdf [file c9nj00327d5.pdf]
